# Supplementary material for: Perampanel, an AMPAR antagonist, alleviates experimental intracerebral hemorrhage-induced brain injury via necroptosis and neuroinflammation
Source: PubMed Central journal article supplement — Mol Med Rep. 2021 May 29;24(2):544. doi: 10.3892/mmr.2021.12183 (PMC8185517; doi:10.3892/mmr.2021.12183), 2021-05-29
Supplement: Supplementary_Data.pdf [file Supplementary_Data.pdf]

Figure S1. Silencing of PTEN by siRNA transfection. (A) PTEN mRNA expression levels were significantly reduced following si-PTEN transfection in HT22 neurons, compared with untransfected parental cells or cells that were transfected with a control siRNA. (B) Cell viability assay showing that siRNA transfection had no effect on cell viability. siRNA, small interfering RNA; Con, control.

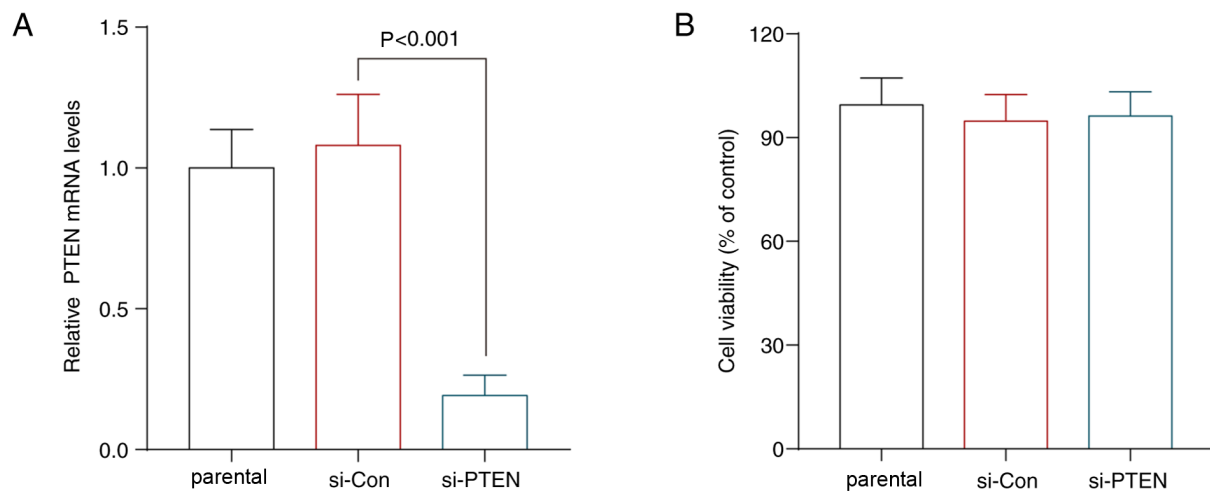

Table SI. Neurological behavior scores.

| Category                               | Behavior                                                                                                        | Score |
|----------------------------------------|-----------------------------------------------------------------------------------------------------------------|-------|
| Spontaneous Activity                   | Moved around, explored the environment, and approached at least three walls of the cage.                        | 3     |
|                                        | Slightly affected moved, did not approach all sides, move hesitating, moved to least one upper rim of the cage. | 2     |
|                                        | Severely affected moved, did not rise up at all and barely moved in the cage.                                   | 1     |
|                                        | Did not move at all.                                                                                            | 0     |
| Symmetry in the Movement of Four Limbs | All four limbs extended symmetrically.                                                                          | 3     |
|                                        | Limbs on left side extended less or more slowly than those on the right.                                        | 2     |
|                                        | Limbs on left side showed minimal movement.                                                                     | 1     |
|                                        | Forelimb on left side did not move at all.                                                                      | 0     |
| Forepaw Outstretching                  | Both forelimbs were outstretched, forepaws walked symmetrically.                                                | 3     |
|                                        | Left side outstretched less than the right, and forepaw walking was impaired.                                   | 1     |
| Climbing                               | Left forelimb moved minimally.                                                                                  | 0     |
|                                        | Left forelimb did not move.                                                                                     | 0     |
|                                        | Climbed easily and gripped tightly to the wire.                                                                 | 3     |
| Body Proprioception                    | Left side impaired while climbing or did not grip as hard as the right side.                                    | 2     |
|                                        | Failed to climb or tended to circle instead of climbing.                                                        | 1     |
| Response to Vibrissae Touch            | Reacted by turning head and was equally startled by the stimulus on both sides.                                 | 3     |
|                                        | Reacted slowly to stimulus on left side.                                                                        | 2     |
|                                        | Did not respond to the stimulus placed on the left side.                                                        | 1     |
|                                        | Reacted by turning head or was equally startled by the stimulus on both sides.                                  | 2     |
|                                        | Reacted slowly to stimulus on left side.                                                                        | 1     |
|                                        | Did not respond to stimulus on the left side.                                                                   | 1     |

Table SII. Sequences of the primers used for reverse transcription-quantitative PCR analysis.

| Gene        | Primer  | Sequence (5'-3')         |
|-------------|---------|--------------------------|
| Mouse GAPDH | Forward | ACAGCAACAGGGTGGTGGAC     |
|             | Reverse | TTTGAGGGTGCAGCGAACTT     |
| Mouse RIP1  | Forward | TCAGGACCACGGTGCCAAAGA    |
|             | Reverse | ATCTCCATAGTGCTGAGCCCAACC |
| Mouse RIP3  | Forward | ACCCTGACTGTGACCCTCCCT    |
|             | Reverse | TCAAGCCCTCCAATGTTCTGC    |
| Mouse MLKL  | Forward | AAGAAGAACCTGCCCGATGA     |
|             | Reverse | CTGGCTGACATCTGAAACGG     |
| Mouse PTEN  | Forward | GAAAGGGACGGACTGGTGTA     |
|             | Reverse | AGTGCCACGGGTCTGTAATC     |

RIP, receptor interacting serine/threonine kinase; MLKL, mixed lineage kinase domain like pseudokinase.
